# Organization and Metabolism of Plastids and Mitochondria in Arbuscular Mycorrhizal Roots of *Medicago truncatula*<sup>1[w]</sup>

Swanhild Lohse, Willibald Schliemann, Christian Ammer, Joachim Kopka, Dieter Strack, and Thomas Fester\*

Leibniz-Institut für Pflanzenbiochemie, Abteilung Sekundärstoffwechsel, D-06120 Halle (Saale), Germany (S.L., W.S., C.A., D.S., T.F.); and Max-Planck-Institut für Molekulare Pflanzenphysiologie, 14476 Potsdam-Golm, Germany (J.K.)

Colonization of root cortical cells by arbuscular mycorrhizal fungi leads to marked cytological changes of plastids and mitochondria. Plastids in particular are forming tubular extensions partially connecting individual organelles in a network-like way. These cytological changes correspond to an increased need for plastid and mitochondrial products during establishment and functioning of the symbiosis. The analysis of metabolite and transcript levels in mycorrhizal and nonmycorrhizal roots from *Medicago truncatula* revealed concomitant changes regarding a number of metabolic pathways. Our results indicate the activation of the mitochondrial tricarboxylic acid cycle and of plastid biosynthetic pathways producing fatty acids, amino acids, and apocarotenoids. These observations provide a general overview of structural and metabolic changes of plastids and mitochondria during colonization of root cortical cells by arbuscular mycorrhizal fungi.

Arbuscular mycorrhiza (AM) is a mutualistic symbiosis between fungi from the order Glomales and roots of >80% of terrestrial plant species (Smith and Read, 1997). The cytological key feature of this interaction is the arbuscule, a haustorium-like fungal structure, forming a symbiotic interface within individual root cortical cells. Arbuscules are dynamic, short-living structures; they are thought to be involved in the transport of a number of nutrients (e.g. carbohydrates and phosphate). During formation of arbuscules, the volume of the plant cell cytosol, the size of the cell nucleus, and the number of the cell organelles increase, pointing to an activation of plant cell metabolism (Bonfante-Fasolo, 1984; Gianinazzi-Pearson, 1996). Plastids in particular are forming stromules (stroma filled tubules; for review, see Kwok and Hanson, 2004), leading to extensive network-like structures in the close vicinity of fungal arbuscules in roots of *Nicotiana tabacum* (Fester et al., 2001) and *Zea mays* (Hans et al., 2004). One special, and only poorly understood, feature of these plastids is the activation of carotenoid biosynthesis (Fester et al., 2002b), leading to the accumulation of various apocarotenoids (Fester et al., 2002a; Strack et al., 2003). Furthermore, it has been shown recently that the plastid-located proteins CASTOR and POLLUX are necessary for the entry of symbiotic bacteria

(*Mesorhizobium loti*) and AM fungi into root cells of *Lotus japonicus* (Imaizumi-Anraku et al., 2005).

Nongreen plastids are important biosynthetic organelles. Metabolic pathways studied in recent years include *N*-assimilation (Esposito et al., 2003), starch biosynthesis (Geigenberger et al., 2004), and lipid biosynthesis (Schwender et al., 2004). There is an obvious need for a number of plastid products during the establishment and functioning of the AM symbiosis. Nevertheless, apart from apocarotenoid accumulation, no changes of plastid metabolism have been described in AM roots so far. We examined such changes by combining analyses of metabolite and transcript levels, including mitochondrial metabolism, which can supply ATP and carbon skeletons to the plastids (Mackenzie and McIntosh, 1999). We chose the AM model plant *Medicago truncatula* (Hause and Fester, 2004) for our analysis because the large amount of EST data available provides a good basis for the analysis of changes in transcript levels by electronic northern. The proliferation of organelles corresponding to the activation of mitochondrial catabolic and plastid anabolic pathways was analyzed by confocal laser scanning microscopy (CLSM) of AM roots containing organelles labeled with green fluorescent protein (GFP) after root transformation, mediated by *Agrobacterium rhizogenes*.

<sup>1</sup> This work was supported by the Deutsche Forschungsgemeinschaft (Bonn, Germany).

\* Corresponding author; e-mail tfester@ipb-halle.de; fax 49-345-5582-1509.

[w] The online version of this article contains Web-only data.

Article, publication date, and citation information can be found at [www.plantphysiol.org/cgi/doi/10.1104/pp.105.061457](http://www.plantphysiol.org/cgi/doi/10.1104/pp.105.061457).

## RESULTS

### Plastid and Mitochondrial Structures in the Roots of *M. truncatula*

CLSM analysis of *M. truncatula* roots transformed with suitably targeted GFP showed that high numbers

of plastids and mitochondria are present within the central cylinder and only few of these organelles within the root cortex (Fig. 1, A, G, and I). In some cases, plastids were forming stromules within the central cylinder (Fig. 1D). AM colonization of roots led to the formation of arbuscules in the inner cortical cell layer (Fig. 1G) and to an increase in the numbers of plastids (Fig. 1, B and E) in the colonized cells. In single optical sections of cortical cells from noncolonized roots, we counted between 2 and 11 plastids (28 cells evaluated), and in single optical sections from colonized cells, 21 to 38 plastids could be observed. In some of these cells, individual plastids became connected by stromules (Fig. 1, C and F) resembling the plastid networks described for *N. tabacum* (Fester et al., 2001) and *Z. mays* (Hans et al., 2004). The connection of plastid metabolism and plastid shape is further demonstrated by plastids from transformed root explants, where plastids were virtually absent from the central cylinder and formed large roundish organelles in cortical cells (Fig. 1H).

In contrast to plastids, mitochondria are of essentially similar, highly variable shape in the central cylinder and in root cortical cells. Spherical forms of these organelles appeared to be more predominant in the root cortex, whereas thread-like forms were observed in particular within the central cylinder (Fig. 1K). Upon colonization of root cortical cells, mitochondrial shape was not changed significantly; however, we observed an increase of mitochondrial numbers and the aggregation of mitochondria in the vicinity of arbuscules (Fig. 1, J and L).

#### Transcript Levels of Key Metabolic Enzymes in AM Roots

A screening of The Institute for Genomic Research (TIGR) *Medicago truncatula* Gene Index (MtGI Release 7.0; <http://www.tigr.org/tdb/tgi/mtgi/>) for tentative consensus (TC) sequences connected to the metabolism of nongreen plastids, mitochondria, or to related cytosolic pathways resulted in about 700 sequences. Comparing the number of respective expressed sequence tags (ESTs) in cDNA libraries from mycorrhizal (in total 19,366 EST clones) and nonmycorrhizal (in total 18,783 EST clones) roots, we calculated likelihood ratios  $R = L^1/L^0$  according to Journet et al. (2002). These ratios refer to the likelihood ( $L^1$ ,  $L^0$ ) of two hypotheses ( $H^1$ ,  $H^0$ ) calculated from the number of EST sequences observed in different libraries. In the null hypothesis  $H^0$ , the frequency of ESTs is constant, and different numbers of EST sequences are due to random variation. In the alternative hypothesis  $H^1$ , the frequency of EST sequences differs in the libraries examined. R-values therefore represent the probability for differential transcript levels regarding two tissues, here mycorrhizal and nonmycorrhizal roots, divided by the probability for identical levels of this transcript. Forty-six of the 700 sequences examined gave  $R = 1.7$  and higher (Table I). Most of the annotations referred

to enzymes of carbohydrate metabolism (including tricarboxylic acid [TCA] cycle and respiratory electron transport chain), followed by enzymes for the biosynthesis of amino acids and fatty acids. The percentage of TC sequences with elevated R-values was particularly high regarding carotenoid metabolism. Three TC sequences were annotated to corresponding enzymes, two of them with  $R = 2.6$ .

After elimination of TC sequences coding for identical enzymes and including TC85625, which is coding for a plastid-targeted isocitrate dehydrogenase and is characterized by a remarkably high number of EST clones in libraries from nonmycorrhizal roots when compared to mycorrhizal roots, we obtained 35 sequences for further analysis (Table I). For a number of these sequences, we observed considerably high numbers of EST clones in cDNA libraries from nodulated roots (comprising 21,371 EST clones in total; Table I). After aligning the putative proteins derived from the TC sequences with proteins of proven function, most TC sequences showed a high degree of sequence identity spanning the complete open reading frame (see Supplemental Table I). A missing similarity in the N-terminal regions of putative proteins in some cases may be explained by the presence of signal peptides for plastid or mitochondrial import.

Transcript levels of the 35 sequences (Table I) in mycorrhizal and nonmycorrhizal roots were measured using real-time RT-PCR. Primers defining 50-bp amplicons were selected from TC regions corresponding to the putative open reading frames (see Supplemental Table II). All primers were tested by conventional PCR and produced single products of the expected size. Analysis of melting behavior of the PCR product after real-time PCR revealed the existence of single PCR products. Standard curves for the various amplicons indicated high amplification efficiencies in all cases presented. In the case of six TC sequences, we did not succeed in selecting suitable primer pairs. These sequences were excluded from the subsequent analyses. Difference of cycle threshold ( $\Delta c_t$ )-values were calculated by subtracting mean  $c_t$ -values of assays from mycorrhizal roots from the respective mean  $c_t$ -values of assays from nonmycorrhizal roots. An amplicon corresponding to the plant translation elongation factor (*EF*)  $1\alpha$  was used for internal standardization by subtracting the  $\Delta c_t$ -value for this amplicon from the  $\Delta c_t$ -values of the various samples resulting in  $\Delta\Delta c_t$ -values. The  $\Delta c_t$ -values regarding this amplicon showed only a minor variation ( $\Delta c_t$  ranging from  $-0.25$ – $0.45$ ), indicating the use of comparable amounts of cDNA. The amplicon corresponding to the mycorrhiza-specific phosphate transporter (*MtPT4*) from *M. truncatula* (Harrison et al., 2002) was used as a control for the existence of a functional mycorrhizal symbiosis (Isayenkov et al., 2004) and for the presence of functionally active arbuscules in particular.  $\Delta\Delta c_t$ -Values regarding this amplicon were ranging between 8.4 (roots harvested 30 d after inoculation) and 9 or 12 (roots harvested 60 d after inoculation),

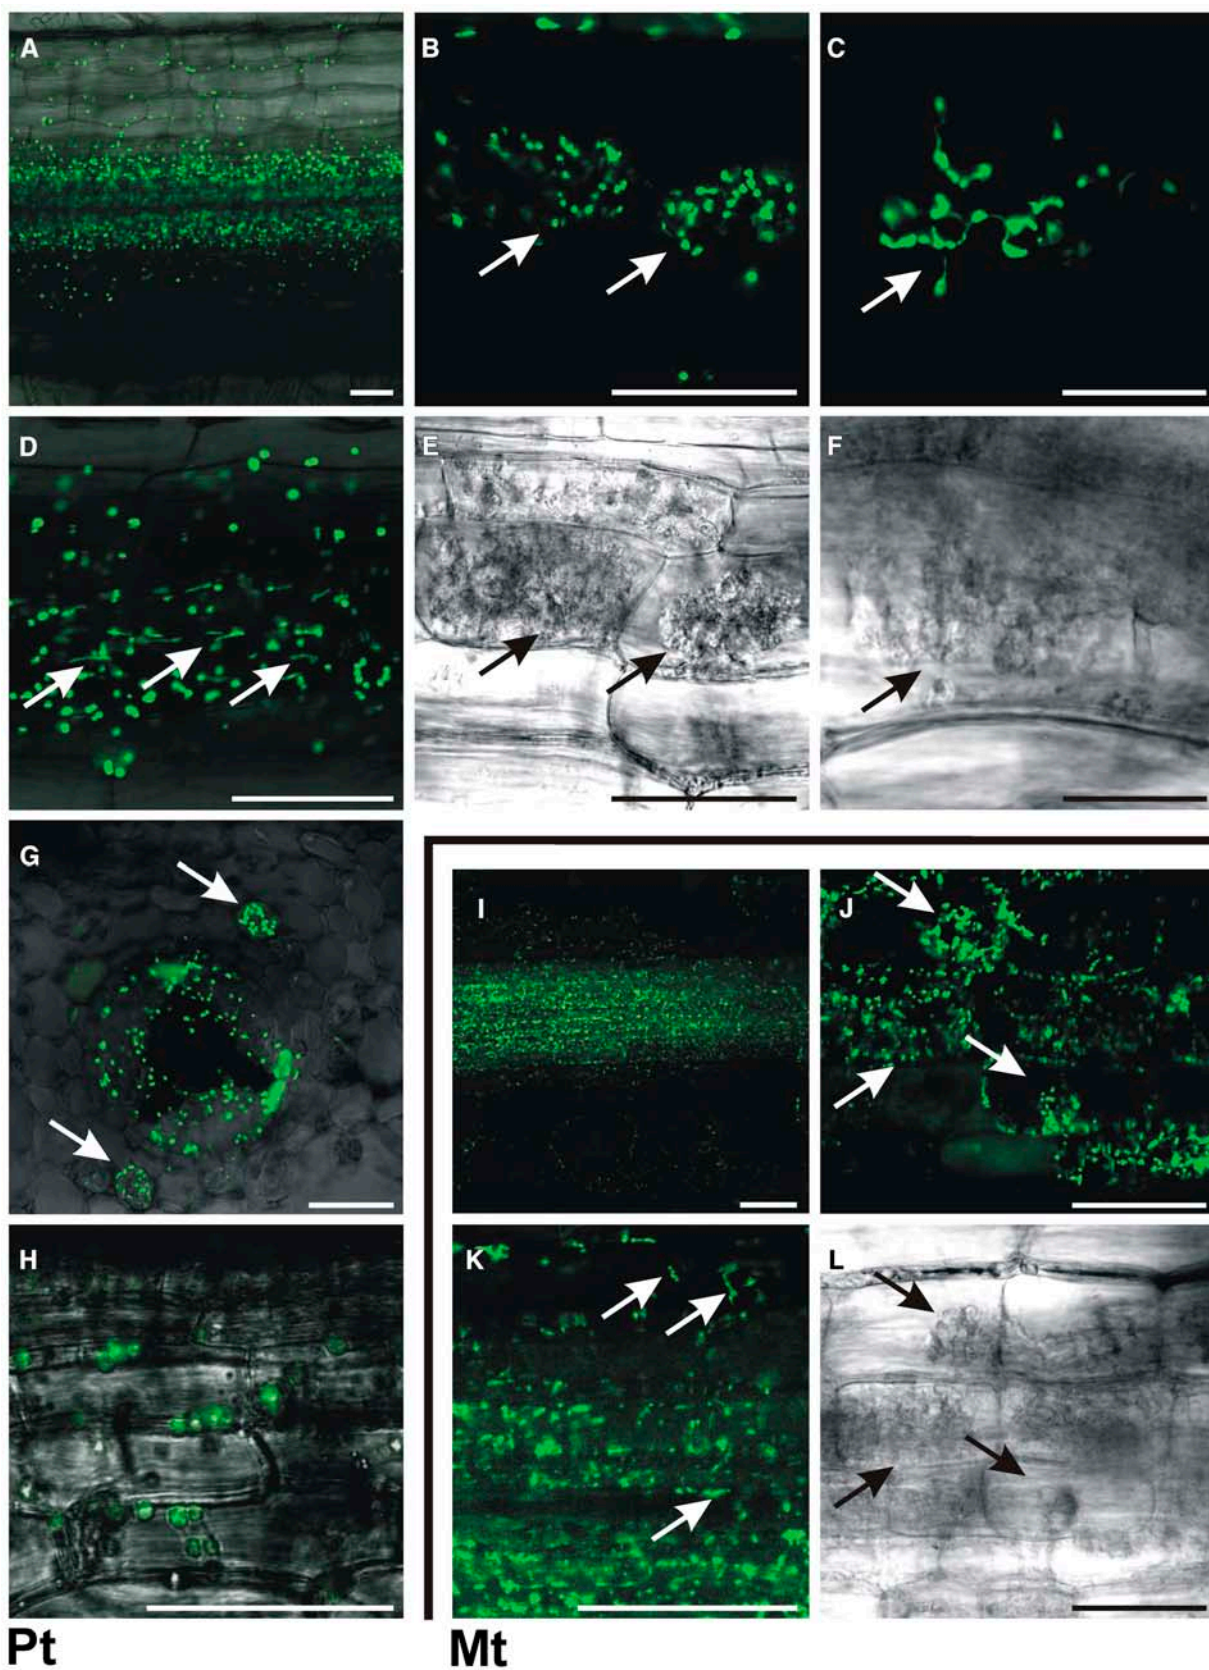

**Figure 1.** Bright-field micrographs and green fluorescence according to CLSM analysis of plastids (A–H) and mitochondria (I–L) labeled by the GFP in mycorrhizal and nonmycorrhizal roots from *M. truncatula*. Longitudinal sections of nonmycorrhizal roots reveal large amounts of plastids (A) and mitochondria (I) within the central cylinder. Corresponding details show stromules of

indicating a high percentage of functional mycorrhizal colonization that corresponded to the microscopically determined degrees of mycorrhizal colonization (colonized roots/whole root system) of approximately 30% (roots harvested 30 d after inoculation) and 70% (roots harvested 60 d after inoculation). The group of plants showing the highest  $\Delta\Delta c_f$ -value for the *MtPT4* amplicon gave the highest  $\Delta\Delta c_f$ -values for most amplicons. The plants harvested 30 d after inoculation with a colonization degree of approximately 30% and a  $\Delta\Delta c_f$ -value for the *MtPT4*-amplicon of 8.4, in contrast, gave the lowest  $\Delta\Delta c_f$ -values for most amplicons.

Roots harvested 90 d after inoculation showed a high degree of mycorrhizal colonization (approximately 80%), a  $\Delta c_f$ -value for the *EF* amplicon of 1.5, and a  $\Delta\Delta c_f$ -value for the *MtPT4* amplicon of 9.5.  $\Delta\Delta c_f$ -values for the amplicons tested, however, were quite low. Only in the case of TC78514 ( $\zeta$ -carotene desaturase), TC79399 (enoyl-acyl carrier protein [ACP] reductase), and TC76985 (pyruvate decarboxylase) did  $\Delta\Delta c_f$ -values reach approximately 1.

Amplicons representing enzymes for amino acid and fatty acid biosynthesis as well as for carotenoid metabolism showed significantly and repeatedly elevated  $\Delta\Delta c_f$ -values regarding the plants harvested 60 d after inoculation. In most cases,  $\Delta\Delta c_f$ -values regarding the plants harvested 30 d after inoculation were elevated as well.  $\Delta\Delta c_f$ -values for these amplicons are summarized in Table I. Regarding amino acid biosynthesis, two of the TC sequences found are annotated to enzymes involved in the assimilation of ammonia and the production of Asn (Asp transaminase and Asn synthase), a major plant storage and transport compound for nitrogen. The third TC sequence is annotated to anthranilate phosphoribosyl transferase, catalyzing the second committed step of Trp biosynthesis. Regarding fatty acid biosynthesis, TC sequences with elevated transcript levels in AM roots have been found for a subunit of the acetyl-CoA carboxylase complex (ACCC) as well as for the ACP *S*-malonyl transferase and the enoyl-ACP reductase. Referring to the metabolism of carotenoids, only three TC sequences had been found by in silico analysis, two of them are characterized by R-values of 2.6 and  $\Delta\Delta c_f$ -values of about 1. These TC sequences are annotated as  $\zeta$ -carotene desaturase and as a carotenoid cleaving enzyme. The first of these enzymes is involved in providing lycopene, the precursor of most other carotenoids, and the second enzyme is responsible for the oxidative cleavage of carotenoids (Schwartz et al., 2001)

leading to carotenoid degradation products comparable to those described repeatedly for AM roots (Fester et al., 2002a).

In summary, our analysis clearly shows an increase in transcript levels referring to enzymes of amino acid and fatty acid biosynthesis as well as carotenoid metabolism. Regarding carbohydrate metabolism, similar increases in transcript levels were predicted by in silico analysis, but were not observed by real-time RT-PCR.

#### Steady-State Levels of Metabolites in AM Roots

Steady-state levels of polar metabolites from mycorrhizal and nonmycorrhizal roots from *M. truncatula* harvested 40 d after inoculation with the AM fungus have been determined using gas chromatography-mass spectrometry (GC-MS) metabolite profiling analysis (Fig. 2A). Regarding polar metabolites, about 170 compounds were identified (the complete data set is given in Supplemental Table III). About 50 of these compounds accumulated to different levels in mycorrhizal and nonmycorrhizal roots, most notably various sugars and sugar alcohols (anhydrosorbitol, Fru, Fuc, galactinol, glycerol, gulose, maltose, maltotriose, mannitol, melezitose, melibiose, *myo*-inositol, rhamnose, Suc, trehalose, and Xyl), organic acids, and amino acids (acetylglutamate, Ala, aminoadipate, aminobutyrate, Arg, Asp, Asn, Cys, dehydroascorbate, ferulate, fumarate, Glu, Gln, indol-3-acetate, Lys, malate, malate, Orn, Pro, pyroglutamate, Tyr, and Trp). In this publication, we focus on compounds referring to plastid and mitochondrial metabolism and on phosphate and trehalose, which are directly linked to a functional mycorrhizal symbiosis (Table II). Apart from clear increases in phosphate levels and from the presence of trehalose in AM roots, we observed significant increases in the levels of the amino acids Asp, Glu, Gln, Lys, Arg, and Cys and lower increases in the levels of Asn, Tyr, and Trp. In addition, two compounds involved in the mitochondrial TCA cycle, fumarate and malate, markedly decreased.

Steady-state levels of nonpolar metabolites from mycorrhizal and nonmycorrhizal roots from *M. truncatula* harvested 40 d after inoculation with the AM fungus have been determined using a different extraction procedure and GC-time of flight (TOF)-MS analysis (Fig. 2B). Most differentially accumulating compounds were identified as fatty acids using authentic reference substances. A significant increase of

**Figure 1.** (Continued.)

plastids (D, see arrows) and thread-like mitochondria (K, see arrows). The cross section of a mycorrhizal root from *M. truncatula* (G) allows a comparison between the occurrence of plastids within the central cylinder and within a colonized cell from the inner cortex (see arrows). Plastids from transformed root explants show large, roundish forms (H). Regarding the micrographs presenting colonized cells (B, C, E, F, J), and L), green fluorescence (B, C, and J) and bright-field micrographs (E, F, and L) are given separately, and arbuscules are marked by arrows. Plastids in such cells are strongly proliferating (B) and forming connecting stromules in some cases (C); mitochondria are proliferating and forming more or less clumped aggregates (J). All bars represent 50  $\mu\text{m}$ , except for C and F, which represent 20  $\mu\text{m}$ .

**Table I.** *In silico* and real-time RT-PCR analysis of transcript levels of *M. truncatula* TC sequences

The table summarizes R- and  $\Delta\Delta C_T$ -values of TC sequences with  $R > 1.7$ . R-values were obtained by comparing EST numbers in cDNA libraries from mycorrhizal (M) and (NM) nonmycorrhizal roots. They represent the probability for differential transcript levels regarding two tissues divided by the probability for identical levels. The number of EST clones found in cDNA libraries from nodulated roots (Nod) is given in parentheses.  $\Delta\Delta C_T$ -Values result from relative quantification (referring to the constitutively expressed translation elongation factor 1 $\alpha$ ) of real-time RT-PCR analyses regarding two independent batches of mycorrhizal and nonmycorrhizal plants, harvested 60 d after inoculation. Results from plants harvested 30 d after inoculation, and consequently less colonized, are given in parentheses in the cases analyzed. TC85523, 87062, 86522, 85559, 89116, and 85632 could not be analyzed due to problems defining suitable primer pairs and are marked as not determined (n.d.).  $\Delta\Delta C_T$ -Values indicating elevated transcript levels in AM roots are marked in bold. ACC, Acetyl-CoA carboxylase; ACP, acyl carrier protein; anthranilate PR transferase, anthranilate phosphoribosyl transferase; CCD, carotenoid 9,10 (9',10') cleaving dioxygenase; cyt, cytosolic; mt, mitochondrial; NDP, nucleoside diphosphate; SOD, superoxide dismutase.

| TC                      | Protein                          | M/NM (Nod) | R-Value | $\Delta\Delta C_T$   |
|-------------------------|----------------------------------|------------|---------|----------------------|
| Carbohydrate metabolism |                                  |            |         |                      |
| TC89468                 | Fru-1,6-bisphosphatase           | 3/0 (0)    | 2.6     | 0.4/−0.1             |
| TC85625                 | Isocitrate dehydrogenase (cyt)   | 7/21 (11)  | 10.5    | 0.2/−0.4             |
| TC76834                 | Isocitrate dehydrogenase (mt)    | 7/2 (22)   | 1.9     | 0.2/0.2              |
| TC87405                 | 6-Phosphogluconate dehydrogenase | 5/0 (0)    | 7.3     | 0.2/−1.0             |
| TC76985                 | Pyruvate decarboxylase           | 8/0 (8)    | 34.0    | 0.4/−0.5             |
| TC85523                 | Respiration, complex I           | 9/2 (4)    | 3.7     | n.d.                 |
| TC87062                 | Respiration, complex III         | 5/0 (5)    | 7.3     | n.d.                 |
| TC86522                 | Respiration, complex IV          | 6/1 (3)    | 2.8     | n.d.                 |
| TC86395                 | Succinate-CoA ligase             | 7/0 (1)    | 20.0    | 0.8/−0.3 (0.2)       |
| TC87174                 | Succinate-CoA ligase             | 6/1 (1)    | 2.8     | 0.3/0.2              |
| TC78918                 | Suc synthase                     | 5/0 (0)    | 7.3     | 0.8/0.0              |
| TC85400                 | Suc synthase                     | 45/17 (67) | 48.0    | 0.6/0.3              |
| TC85632                 | Transaldolase                    | 12/4 (6)   | 2.9     | n.d.                 |
| Amino acid biosynthesis |                                  |            |         |                      |
| TC87326                 | Anthranilate PR transferase      | 4/0 (0)    | 4.4     | <b>1.9/1.0 (0.3)</b> |
| TC85436                 | Asn synthetase (cyt)             | 11/1 (19)  | 22.0    | <b>2.0/0.2 (0.9)</b> |
| TC77230                 | Asparaginase                     | 3/0 (6)    | 2.6     | 0.2/−0.8             |
| TC86066                 | Asp transaminase                 | 5/1 (6)    | 1.9     | <b>1.9/1.2 (0.9)</b> |
| TC85944                 | Asp transaminase (cyt)           | 8/0 (5)    | 34.0    | 0.2/−0.1             |
| TC77163                 | Chorismate synthase              | 3/0 (0)    | 2.6     | 0.6/−0.4             |
| TC76602                 | Cysteine synthase                | 6/1 (1)    | 2.8     | 0.8/−1.4 (0.1)       |
| TC76943                 | Gln synthetase (cyt)             | 13/5 (5)   | 2.4     | 0.5/0.3              |
| TC86783                 | Shikimate kinase                 | 5/1 (0)    | 1.9     | −0.4/−0.4            |
| Fatty acid biosynthesis |                                  |            |         |                      |
| TC88181                 | ACCB                             | 3/0 (1)    | 2.6     | 1.5/0.5              |
| TC86279                 | ACCC                             | 7/2 (0)    | 1.9     | <b>1.3/0.9 (0.8)</b> |
| TC85559                 | ACCD                             | 10/4 (1)   | 1.7     | n.d.                 |
| TC77871                 | ACP S-malonyltransferase         | 6/0 (0)    | 12.0    | <b>2.0/1.3 (0.5)</b> |
| TC79399                 | Enoyl-ACP reductase              | 4/0 (0)    | 4.4     | <b>1.7/1.1 (0.7)</b> |
| Carotenoid metabolism   |                                  |            |         |                      |
| TC78514                 | ζ-Carotene desaturase            | 3/0 (1)    | 2.6     | <b>1.3/1.3 (0.0)</b> |
| TC77454                 | CCD                              | 3/0 (1)    | 2.6     | <b>1.5/1.0 (0.5)</b> |
| Various transcripts     |                                  |            |         |                      |
| TC89116                 | Argininosuccinate synthase       | 3/0 (1)    | 2.6     | n.d.                 |
| TC76898                 | Dehydroascorbate reductase       | 5/0 (5)    | 7.3     | 0.2/−0.8             |
| TC77009                 | Ferritin                         | 14/0 (5)   | 741.0   | 1.0/−1.0 (0.2)       |
| TC87275                 | Fe-SOD                           | 5/0 (0)    | 7.3     | 1.0/0.2 (−1.0)       |
| TC77125                 | Immunophilin                     | 11/2 (9)   | 7.5     | 0.2/−1.0             |
| TC85556                 | NDP kinase                       | 16/4 (26)  | 9.5     | −0.4/−0.4            |

metabolite levels in AM roots was observed in the case of palmitate, oleate, and stearate (Table II). In addition, increases in linolenate and linoleate levels were also observed. Palmitvaccenoate and vaccenoate appeared as fungus-specific compounds in AM roots.

## DISCUSSION

The massive proliferation of plastids in colonized root cortical cells from *N. tabacum* (Fester et al., 2001) and *Z. mays* (Hans et al., 2004) suggested a crucial role for these organelles. Increased amounts of products

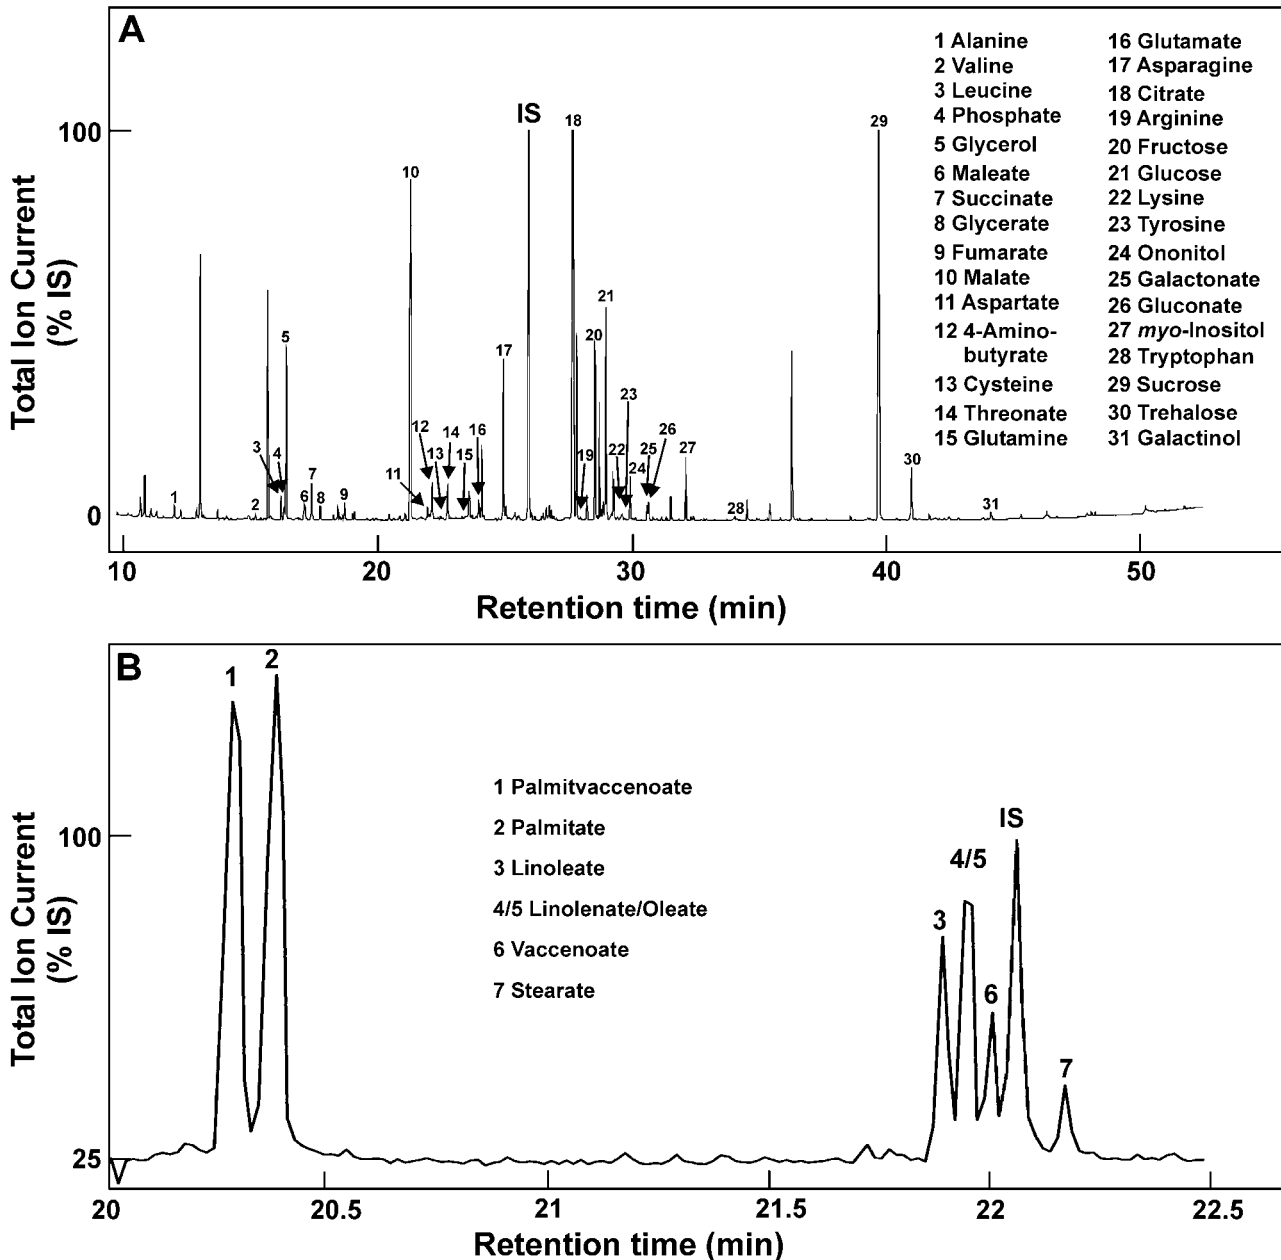

**Figure 2.** Representative GC-MS profile of polar (A) and GC-TOF-MS profile of nonpolar (B) metabolites from mycorrhizal *M. truncatula* root samples harvested 40 d after inoculation. Metabolites were identified using specific mass fragments and validated by the Automated Mass Spectral Deconvolution and Identification System in (A) and using authentic reference substances in (B). Regarding polar metabolites, only a part of the metabolites identified is indicated. The complete data set is given in Supplemental Table III. Regarding nonpolar metabolites, only the part of the chromatogram with signals from fatty acids is presented. A quantitative comparison of metabolite levels in mycorrhizal and nonmycorrhizal roots using ribitol (polar metabolites) and methyl nonadecanoate (nonpolar metabolites) as internal standards (IS) and referring to metabolites relevant for plastid or mitochondrial metabolism is given in Table II.

from plastid biosynthetic pathways (e.g. fatty acids or amino acids) are necessary to allow the formation of symbiotic structures (e.g. the periarbuscular membrane) and to support the general increase in metabolic activity. To detect corresponding metabolic changes, we examined plastid biosynthetic activity in AM roots of the model plant *M. truncatula*. Mitochondria were

included in this analysis because they are providing ATP and carbon skeletons for plastid metabolism.

#### The Identification of Metabolic Changes in AM Roots

Possibly differentially accumulating transcripts were selected in a first screen by electronic northern



**Table II.** Levels of polar and nonpolar metabolites from mycorrhizal (M) and nonmycorrhizal (NM) roots of *M. truncatula* harvested 40 d after inoculation

Only differentially accumulating metabolites relevant for plastid or mitochondrial metabolism are listed. Polar metabolites were analyzed by GC-MS-based metabolite profiling of methoxyaminated and trimethylsilylated derivatives. Nonpolar metabolites were analyzed by GC-TOF-MS-based metabolite profiling of trimethylsilylated derivatives. Representative chromatograms are given in Figure 2; the complete data set regarding polar metabolites is given in Supplemental Table III. Metabolites are represented by specific mass fragments that are characterized by mass-to-charge ratio ( $m/z$ ), by the retention time index (RI), and by the difference between measured and expected RI ( $\Delta$ RI). These fragments were used for the quantification of each metabolite after normalization to internal standards (ribitol and methyl nonadecanoate, respectively). Replicate analyses ( $n = 3$ ) were performed referring to three independent biological samples of mycorrhizal and nonmycorrhizal roots. The relative SD (%SD) of measurements is in parentheses. Unless indicated otherwise, Student's  $t$  test resulted in  $P \leq 0.05$ . Metabolites marked as undetected (u.) in (NM) roots are exclusively produced by the fungus; the other metabolites are produced by both symbiotic organisms. n.d., Not determined.

| Metabolite              | Fragment ( $m/z$ ) | RI       | $\Delta$ RI | Response NM (SD) | Response M (SD) | Response Ratio (M/NM) |
|-------------------------|--------------------|----------|-------------|------------------|-----------------|-----------------------|
| Polar metabolites       |                    |          |             |                  |                 |                       |
| Phosphate               | 314                | 1,272.24 | -5.6        | 0.33 (168)       | 3.95 (33)       | 12.00                 |
| Trehalose               | 169                | 2,734.50 | -15.3       | u.               | 6.35 (24)       | -                     |
| Arg                     | 157                | 1,827.20 | -5.2        | 1.46 (9)         | 5.97 (10)       | 4.10                  |
| Asn <sup>a</sup>        | 258                | 1,678.10 | -4.3        | 11.81 (28)       | 33.65 (52)      | 2.85                  |
| Asp                     | 232                | 1,516.20 | -9.0        | 6.93 (27)        | 11.24 (17)      | 1.62                  |
| Cys                     | 220                | 1,558.10 | -2.6        | 1.72 (17)        | 12.41 (20)      | 7.20                  |
| Fumarate                | 217                | 1,354.90 | -4.0        | 0.25 (35)        | 0.10 (19)       | 0.41                  |
| Glu                     | 246                | 1,623.10 | -8.6        | 5.80 (18)        | 17.58 (25)      | 3.03                  |
| Gln                     | 156                | 1,779.80 | -4.8        | 0.06 (41)        | 0.30 (44)       | 5.32                  |
| Lys                     | 174                | 1,914.40 | -7.1        | 1.13 (38)        | 2.19 (22)       | 1.93                  |
| Malate                  | 335                | 1,486.30 | -5.4        | 43.69 (30)       | 20.45 (16)      | 0.47                  |
| Tyr <sup>a</sup>        | 280                | 1,932.30 | -8.8        | 0.08 (52)        | 0.18 (43)       | 2.35                  |
| Trp <sup>a</sup>        | 202                | 2,206.20 | -10.9       | 1.89 (43)        | 3.93 (39)       | 2.08                  |
| Nonpolar metabolites    |                    |          |             |                  |                 |                       |
| Palmitvaccenoate        | 311                | n.d.     |             | u.               | 430 (15)        | -                     |
| Vaccenoate              | 339                | n.d.     |             | u.               | 96 (34)         | -                     |
| Linolenate <sup>b</sup> | 335                | n.d.     |             | 23 (44)          | 46 (32)         | 2.0                   |
| Linoleate <sup>a</sup>  | 337                | n.d.     |             | 44 (23)          | 92 (34)         | 2.1                   |
| Oleate                  | 339                | n.d.     |             | 8 (17)           | 68 (23)         | 8.6                   |
| Palmitate               | 313                | n.d.     |             | 230 (10)         | 610 (19)        | 2.7                   |
| Stearate                | 341                | n.d.     |             | 35 (12)          | 71 (14)         | 2.0                   |

<sup>a</sup> $P \leq 0.15$  (Student's  $t$  test). <sup>b</sup> $P \leq 0.07$  (Student's  $t$  test).

analysis prior to a closer analysis by real-time RT-PCR. Whereas only few differentially accumulating transcripts connected to primary metabolism have been observed in AM roots using cDNA arrays for transcript profiling (Liu et al., 2003), electronic northern analysis resulted in a number of sequences that could be analyzed further.

There are a number of problems when analyzing metabolic changes in AM roots: (1) Our measurements refer to whole root systems, containing relatively small numbers of colonized cells (Fig. 1G) of varying symbiotic state. Accordingly, our analysis underestimates the actual changes regarding transcript and metabolite levels in individual colonized cells.

(2) Transcript levels referring to primary metabolism may depend on various external factors, possibly explaining the poor correlation between a number of R- and  $\Delta\Delta c_f$ -values. The TC sequences annotated to Asp transaminase and ACCC, example given, were characterized by small R-values (1.9 each) but had

clearly elevated transcript levels in AM roots according to real-time RT-PCR. Other TC sequences with high R-values like ferritin (741), Suc synthase (48), or pyruvate decarboxylase (34) were apparently not induced in our plants according to real-time RT-PCR.

(3) A further problem regards the interpretation of metabolite data. Whereas the plant origin of apocarotenoids (Walter et al., 2000) and some fatty acids (Olsson, 1999) as well as the predominant fungal origin of trehalose (Douds et al., 2000) and a different set of fatty acids (Olsson, 1999) have been shown before, it is impossible to determine the biosynthetic origin of individual intermediates of carbohydrate catabolism or amino acid biosynthesis. Nevertheless, the observation of concomitant changes of metabolite and transcript levels regarding individual enzymatic steps allows the identification of metabolic pathways apparently induced in colonized roots (Fig. 3). Thus, our data provide a comprehensive view of the





mitochondria or plastids. The finding of reduced steady-state levels of these two compounds is indicative most likely for an increased activity of the TCA cycle. This conclusion is supported by positive *in silico* results for a number of respective TC sequences. Regarding the activation of other pathways of carbohydrate catabolism (glycolysis or the pentose phosphate pathway [PPP]), only few *in silico* and no experimental data were obtained. Because products of these pathways, however, are necessary for building up fatty acids and carotenoids, a respective activation in AM roots appears likely.

### Functional Significance of the Metabolic Changes Observed

The cellular changes observed during the formation of arbuscules suggest a general activation of plant cell metabolism (Bonfante-Fasolo, 1984; Gianinazzi-Pearson, 1996). This activation results in a higher demand for most products of plastid metabolism, including nucleotides, amino acids, and fatty acids. In agreement with our findings, fatty acids can be predicted to be of particular importance. Building up the periarbuscular membrane, colonized cells are increasing twofold to fourfold the surface of their plasma membrane (Bago et al., 2000). In addition, intracellular membrane systems, e.g. plastid, mitochondrial, or endoplasmic reticulum membranes (Hause and Fester, 2004), are proliferating as well. In contrast to this, the prominent position of the biosynthetic pathway leading to Asp and Asn (Fig. 3) reflects either an increasing demand for protein biosynthesis or the ability of AM fungi to provide nitrogen to their host plants (Hodge et al., 2001) and the use of Asn as a major compound for storage and transport of nitrogen in *M. truncatula*. The latter process might involve plastids from the central cylinder as well as plastids from colonized root cortical cells. Finally, the functional meaning of apocarotenoid biosynthesis has not been explained so far (Strack et al., 2003), although such compounds are accumulating in AM roots from a large variety of plants, in some cases to considerable levels (Fester et al., 2002a, 2005), and the induction of respective enzymes has been shown in a number of cases (Walter et al., 2000; Fester et al., 2002b; Hans et al., 2004). Recent experiments suggest a connection of this phenomenon with the accumulation of hydrogen peroxide close to disintegrating arbuscules (Fester and Hause, 2005).

The analysis of metabolic flux and regulation in specialized nongreen plastids in recent years has provided crucial features of metabolism in these organelles. In short, the oxidative PPP can be assumed to be the main source for NADPH as has been shown in a number of studies regarding Glu biosynthesis (Bowsher et al., 1989, 1992; Wright et al., 1997; Esposito et al., 2003). The intermediates of the oxidative PPP and glycolysis have been shown to be rapidly exchangeable between plastids and the cytosol when analyzing fatty acid producing *Brassica napus* embryos

(Schwender et al., 2004). ATP-consuming pathways, like the methylerythritol-P pathway necessary for carotenoid biosynthesis, are mainly controlled by the activity of the ATP translocator in the inner plastid envelope as has been shown for starch biosynthesis in potato (*Solanum tuberosum*) tubers (Geigenberger et al., 2004). Furthermore, it is tempting to speculate that phosphate provided by the fungus might have a direct influence on the various translocators situated in the inner plastid envelope and on starch biosynthesis (Douds et al., 2000), leading to a higher level of glycolytic intermediates within the cytosol. Thus, the provision of high amounts of phosphate by the fungus might be ultimately linked to an elevated amount of carbohydrates available for the fungus.

### Cytological Changes during Arbuscule Formation

Regarding mitochondria, Logan and Leaver (2000) described shapes ranging from spherical to sausage- or thread-like forms for roots from *Arabidopsis* (*Arabidopsis thaliana*). In *M. truncatula* as in *Arabidopsis*, spherical forms appear to be more predominant within root cortical cells, whereas thread-like forms are abundant in the central cylinder. Nevertheless, there is a certain percentage of thread-like mitochondria in root cortical cells from *M. truncatula*. Upon colonization of root cortical cells, mitochondria are aggregating in the vicinity of arbuscules forming clumps similar to those reported by Logan and Leaver (2000) for cells from the *Arabidopsis* hypocotyl.

Plastids in the roots of *M. truncatula* show a wide range of structural variation: Plastids from the cortex of root explants have a very large, amyloplast-like appearance without possessing any stromules, and plastids from the root cortex of intact plants are much smaller, but apparently free of stromules as well. Stromules become visible in the case of plastids from the central cylinder, from root nodules (B. Hause, K. Demchenko, and K. Pawlowski, personal communication), and from root cortical cells colonized by AM fungi. Plastids from root nodules and from arbusculated root cortical cells do not only share structural features, but some metabolic features as well. According to a metabolite and transcript profiling project for the rhizobial interaction of *L. japonicus*, another member of the *Fabaceae*, plastids from root nodules are mainly involved in the biosynthesis of amino acids, most notably Asn, which is the major export form of nitrogen from the nodules of *L. japonicus* and *M. truncatula* (Colebatch et al., 2004). Similarities regarding this metabolic pathway are further suggested by our electronic northern analysis. cDNA libraries from mycorrhizal and nodulated roots show similar numbers of EST clones connected to Asn or Asp metabolism, which is not the case for sequences connected to fatty acid biosynthesis or apocarotenoid accumulation. Plastid stromule formation has been suggested to be linked to increased metabolic activity of plastids (e.g. Kwok and Hanson, 2004; Waters et al., 2004). Such

a correlation seems to be supported by the examples presented above.

There are several possible reasons for the correlation of plastid metabolic activity and stromule formation. Stromules allow the plastids of a given cell to physically interact with each other. In the case of arbusculated cells from *N. tabacum* and *Z. mays*, plastids seem to form one large compartment, covering the growing arbuscule in a net-like appearance. In the case of *M. truncatula*, this interconnection is somewhat less pronounced. In addition, an increase in the area of the plastid inner envelope may be necessary for the exchange of plastid metabolites and in particular for the biosynthesis of lipophilic compounds, like fatty acids and carotenoids. A possible connection between carotenoid biosynthesis and stromule formation in AM roots is suggested by a comparison of these features in *M. truncatula* on one hand and in *N. tabacum* and *Z. mays* on the other. Both the activity of carotenoid biosynthesis (Fester et al., 2002a, 2002b) and of stromule formation appear to be decreased in *M. truncatula* when compared with these two plants.

## Outlook

The use of organelle-targeted GFP and the complementary results regarding transcript and metabolite levels provided a first general overview of structural and metabolic changes of cell organelles during colonization by AM fungi. To our knowledge, the magnitude and extent of these changes are not paralleled by other biological processes involving root plastids. A detailed functional analysis of the formation of plastid networks in AM roots might reveal factors involved in signaling between nucleus and plastids, between individual plastids, and between the plant and the fungal cell. The data presented here define possible markers for such an analysis regarding metabolic changes. Similar markers for the study of structural changes are currently being studied (e.g. the plastid division protein FtsZ; Osteryoung and McAndrew, 2001) or still have to be determined (e.g. genes involved in stromule formation).

## MATERIALS AND METHODS

### Plant Material and AM Fungus Inoculation

Barrel medic (*Medicago truncatula* L. Gaertn. var Jemalong) was grown in a greenhouse in pots filled with expanded clay (Lecaton, 2–5 mm particle size; Fibo Exclay Deutschland). Seven-day-old seedlings (five plants per 500-mL pot) were inoculated with the AM fungus *Glomus intraradices* Schenck and Smith by the application of propagules in expanded clay (isolate 49, provided by H. von Alten from the collection of the Institut für Pflanzenkrankheiten und Pflanzenschutz der Universität Hannover, Germany). Further details of plant growth conditions have been described previously (Maier et al., 1995). Roots were harvested at 30, 60, or 90 d after inoculation. Part of the root system from each pot was used for the estimation of approximate colonization percentage (colonized roots/whole root system) according to Philips and Hayman (1970) after staining with trypan blue in lactophenol. The rest of the roots was homogenized in liquid nitrogen and stored at  $-80^{\circ}\text{C}$ .

### Root Transformation and Microscopy Analysis

Roots of *M. truncatula* were transformed according to the method published by Boisson-Dernier et al. (2001) using the *Agrobacterium rhizogenes* strain ARqual. A construct containing the signal peptide of spinach (*Spinacia oleracea*) ferredoxin NADP(H) oxidoreductase fused to a modified version of the GFP cloned in pBIN (kindly provided by R.B. Klösgen, Halle, Germany; for further description, see Marques et al., 2004) was used for targeting the GFP to plastids. A similar construct in pSMAB701 containing the signal peptide of the  $\gamma$ -subunit of the Arabidopsis (*Arabidopsis thaliana*) mitochondrial  $F_1$ -ATPase (kindly provided by Y. Niwa, Shizuoka, Japan; for further description, see Niwa et al., 1999) was used for targeting a modified version of the GFP (S65T-GFP) to mitochondria. Composite plants with transformed roots were selected by fluorescence stereomicroscopy (using the GFP1-filter of the MZ FLIII from Leica) before being planted into open pots filled with expanded clay and the mycorrhizal inoculum (*G. intraradices* Schenck and Smith). Hairy root explants were prepared by repeated subculturing of transformed roots, first in liquid culture containing 1 mg mL<sup>-1</sup> augmentin, then on agar plates containing the same amount of the antibiotic. The composite plants were accustomed to greenhouse conditions and harvested after approximately 8 weeks. Transformed roots were selected again by fluorescence stereomicroscopy, sliced with a razor blade, and immediately analyzed by CLSM. CLSM was performed using the LSM 510 Meta from Zeiss equipped with a Kr/Ar laser (emission at 488 nm). GFP fluorescence (filter setting: NFT545, BP505–530), orange red autofluorescence of root cell walls and arbuscules (filter setting: NFT545, LP560), as well as bright-field micrographs were collected simultaneously.

### In Silico Analysis of Gene Expression

TC sequences corresponding to enzymes from various metabolic pathways were searched using the respective lists provided by the TIGR *Medicago truncatula* Gene Index (MtGI Release 7.0; <http://www.tigr.org/tdb/tgi/mtgi/>). TC and clone identification numbers are further given according to the MtGI nomenclature. The numbers of ESTs constituting the TC sequences were compared in three cDNA libraries from mycorrhizal roots (MHAM, MTAMP, MTBC; comprising 19,366 EST clones) on the one hand, and five libraries from nonmycorrhizal roots (MTBA, KVO, MTRHE, rootphos-, developing root; comprising 18,783 EST clones) on the other hand. The likelihood ratio (R) between the two hypotheses that a given gene is differentially expressed (H<sup>1</sup>) and that it is not differentially expressed (H<sup>0</sup>) was calculated for every TC sequence analyzed according to Equations 4 and 8 from Journet et al. (2002). TC sequences with R = 1.7 and higher were aligned against their most similar tentative annotations as given by MtGI or as found by BLAST homology search using the BLAST algorithm (<http://www.ncbi.nlm.nih.gov/BLAST/>). Details of annotation are given online in Supplemental Table I. For estimating transcript levels of these TC sequences in nodulated roots, the number of respective EST clones in the libraries MtSN4, GVN, GVSN, *M. truncatula* R108 Mt, nodulated root, and MtBB (comprising 21,373 sequences in total) were counted.

### Analysis of Transcript Steady-State Levels

Total RNA was extracted from roots using a modified protocol from Gibco BRL Life Technologies. Ground, frozen root material (100 mg) was suspended in 1 mL TriReagent (Sigma-Aldrich). After centrifugation, the supernatant was extracted with chloroform, and RNA was precipitated by adding 250  $\mu\text{L}$  0.8 M sodium citrate, 1.2 M sodium chloride, and 250  $\mu\text{L}$  isopropanol to 450  $\mu\text{L}$  solution. The RNA pellet was washed twice with 75% (v/v) ethanol, dissolved in 20  $\mu\text{L}$  water, and analyzed photometrically and by nondenaturing agarose/ethidium bromide gel electrophoresis. cDNA was synthesized using Moloney murine reverse transcriptase (Promega) according to the instructions from the manufacturer.

Primers for real-time PCR analysis were designed for all TC sequences showing R-values >1.7 using Primer Express software (Applied Biosystems). Prior to primer design, the parts of the TC sequences without homology to the coding sequence of the most similar tentative annotation were deleted. When comparing primer pairs with the MtGI database, six primer pairs recognized closely related TC sequences annotated to the same enzymes. In all other cases, primer pairs recognized only the TC sequence they had been derived from. The primers used for analysis are given online in Supplemental Table II.

Real-time PCR was performed using an Applied Biosystems Prism 7000 sequence detection system according to the instructions from the manufacturer. Amplification was followed using the dye SYBR Green I in assays with

a total volume of 20  $\mu\text{L}$ . The quality of primers and the efficiency of the amplification were checked by conventional PCR, by analyzing the melting behavior of the PCR product after real-time PCR, and by running standard curves using five different dilutions (factor 4) of cDNA. All assays (standard curve and measurements) were run with three technical parallels. For each transcript studied, three biologically independent samples from mycorrhizal and nonmycorrhizal roots were measured, respectively, summing up to 18 assays per transcript. The data were evaluated using the comparative  $C_T$  method for relative quantitation as specified by Applied Biosystems.  $\Delta C_T$ -values were calculated by subtracting mean  $C_T$ -values of assays from mycorrhizal roots from the respective mean  $C_T$ -values of assays from non-mycorrhizal roots. The analysis was performed twice using two different plant batches harvested 60 d after inoculation. Amplicons showing high  $\Delta C_T$ -values were then analyzed again using roots harvested 30 and 90 d after inoculation, respectively. An amplicon corresponding to TC85208 (annotated to the translation elongation factor 1 $\alpha$ ; 5'-AGCACCAAGCAAAGCATCCT-3', 5'-AGG-TTGTTACTCGTTCGGATCCT-3') was used as an endogenous control and an amplicon corresponding to the *M. truncatula* phosphate transporter 4 (AY116210; Harrison et al., 2002; 5'-ACAAATTGATAGGATTCCTTTG-CACGT-3', 5'-TCACATCTTCTCAGTTCTTGAGTC-3') as a positive control.  $\Delta\Delta C_T$ -Values were calculated by subtracting the  $\Delta C_T$ -value for the constitutively expressed translation elongation factor 1 $\alpha$  from the  $\Delta C_T$ -values of the various samples. cDNA assays without reverse transcriptase (RT<sup>-</sup>) were used as a control for a possible amplification of contaminating DNA material. We only evaluated samples when these real-time PCR assays either gave no amplification or when the weak signals eventually observed accounted for <2% of the template measured in nonmycorrhizal roots.

### Analysis of Nonpolar Metabolite Steady-State Levels

Roots of *M. truncatula* were harvested 40 d after inoculation with *G. intraradices*. After addition of 15  $\mu\text{L}$  methyl nonadecanoate (0.2 mg mL<sup>-1</sup> CHCl<sub>3</sub>, internal standard), lyophilized roots (30 mg) were homogenized in a mortar with addition of solid CO<sub>2</sub> and extracted three times with 0.5 mL hexane. Aliquots of the extracts were derivatized using *N*-methyl-*N*-(trimethylsilyl)-trifluoroacetamide (30 min, 70°C) after reducing to dryness. Metabolites were separated and analyzed using a gas chromatograph (Agilent 6890) equipped with a TOF-MS (GCT; Waters). Column specifications are as follows: DB-5 MS 30 m  $\times$  0.25 mm, i.d.; 0.25- $\mu\text{m}$  film thickness; carrier gas, helium at constant flow 1 mL min<sup>-1</sup>; temperature program, 2 min 50°C, then 10°/min to 300°, 10 min 300°, 10°/min to 320°, 11 min at 320°. Splitless injection was as follows: 1  $\mu\text{L}$  at 250°; mass-to-charge ratio 40 to 800.

### Analysis of Polar Metabolite Steady-State Levels

Metabolites were extracted according to Roessner et al. (2000) with the following modifications. Aliquots of ground root samples were mixed with 360  $\mu\text{L}$  methanol (-20°C) plus 30  $\mu\text{L}$  ribitol in methanol (0.2 mg mL<sup>-1</sup>) and 30  $\mu\text{L}$  d<sub>4</sub>-Ala in water (1 mg mL<sup>-1</sup>). Samples were shaken for 15 min at 70°C before addition of 200  $\mu\text{L}$  chloroform and further shaking at 37°C for 5 min. After addition of 400  $\mu\text{L}$  water, samples were vortexed, then centrifuged at 21,000g for 5 min at room temperature. Two 80- $\mu\text{L}$  aliquots of the aqueous phase were transferred to Eppendorf tubes and dried at room temperature by vacuum centrifugation (Centrivac; Heraeus). Metabolite derivatization was performed according to Roessner et al. (2000) with the following modifications. One of each pair of dried samples was resuspended in 40  $\mu\text{L}$  methoxyamine hydrochloride (20 mg mL<sup>-1</sup> in pyridine) at 30°C for 90 min and 70  $\mu\text{L}$  *N*-methyl-*N*-(trimethylsilyl)-trifluoroacetamide plus 10  $\mu\text{L}$  alkane mixture (see below). GC-MS spectra were obtained with a GC8000 gas chromatograph coupled to a Voyager quadrupole-type mass spectrometer operated by MassLab software (ThermoQuest). Modifications to the initial GC-MS profiling method (Fiehn et al., 2000a, 2000b) included injection of a 1- $\mu\text{L}$  sample in splitless mode, use of a 5°C min<sup>-1</sup> temperature ramp with final temperature set to 320°C on a 30 m  $\times$  0.25 mm i.d. Rtx-5Sil MS capillary column with an integrated guard column (Restek), and use of the C<sub>12</sub>, C<sub>15</sub>, C<sub>19</sub>, C<sub>22</sub>, C<sub>25</sub>, and C<sub>36</sub> *n*-alkane mixtures for the determination of retention time index. Metabolites were identified and quantified as detailed by Colebatch et al. (2004).

### ACKNOWLEDGMENTS

The authors thank Dr. J.P. Marques (Martin-Luther-University Halle-Wittenberg, Germany) and Dr. R.B. Klösgen (Martin-Luther-University Halle-

Wittenberg, Germany) for kindly providing a transformation construct for targeting the GFP into plastids, Dr. Y. Niwa (University of Shizuoka, Japan) for a similar construct regarding the labeling of mitochondria, and Dr. P.A. Olsson (University of Lund, Sweden) for cooperation in identifying fatty acids.

Received February 16, 2005; revised June 2, 2005; accepted June 7, 2005; published August 26, 2005.

### LITERATURE CITED

- Bago BB, Pfeffer PE, Shachar-Hill Y (2000) Carbon metabolism and transport in arbuscular mycorrhizas. *Plant Physiol* **124**: 949–957
- Boisson-Dernier A, Chabaud M, Garcia F, Bécard G, Rosenberg C, Barker DG (2001) *Agrobacterium rhizogenes*-transformed roots of *Medicago truncatula* for the study of nitrogen-fixing and endomycorrhizal symbiotic associations. *Mol Plant Microbe Interact* **14**: 695–700
- Bonfante-Fasolo P (1984) Anatomy and morphology of VA mycorrhiza. In CL Powell, DJ Bagyaraj, eds, *VA Mycorrhiza*. CRC Press, Boca Raton, FL, pp 5–33
- Bowsher CG, Boulton EL, Rose J, Nayagam S, Emes MJ (1992) Reductant for glutamate synthase is generated by the oxidative pentose phosphate pathway in non-photosynthetic root plastids. *Plant J* **2**: 893–898
- Bowsher GC, Hucklesby DP, Emes MJ (1989) Nitrite reduction and carbohydrate metabolism in plastids purified from roots of *Pisum sativum* L. *Planta* **177**: 359–366
- Colebatch G, Desbrosses G, Ott T, Krusell L, Montanare O, Kloska S, Kopka J, Udvardi MK (2004) Global changes in transcription orchestrate metabolic differentiation during symbiotic nitrogen fixation in *Lotus japonicus*. *Plant J* **39**: 487–512
- Douds DD, Pfeffer PE, Shachar-Hill Y (2000) Carbon partitioning, cost and metabolism of arbuscular mycorrhizae. In Y Kapulnik, DD Douds, eds, *Arbuscular Mycorrhizas: Physiology and Function*. Kluwer Academic Press, Dordrecht, The Netherlands, pp 107–130
- Esposito S, Massaro G, Vona V, Di Martino Rigano V, Carfagna S (2003) Glutamate biosynthesis in barley roots: the role of the plastidic glucose-6-phosphate dehydrogenase. *Planta* **216**: 639–647
- Fester T, Hause G (2005) Accumulation of reactive oxygen species in arbuscular mycorrhizal roots. *Mycorrhiza* **15**: 373–379
- Fester T, Hause B, Schmidt D, Halfmann K, Schmidt J, Wray V, Hause G, Strack D (2002a) Occurrence and localization of apocarotenoids in arbuscular mycorrhizal plant roots. *Plant Cell Physiol* **43**: 256–265
- Fester T, Schmidt D, Lohse S, Walter MH, Giuliano G, Bramley PM, Fraser PD, Hause B, Strack D (2002b) Stimulation of carotenoid metabolism in arbuscular mycorrhizal roots. *Planta* **216**: 148–154
- Fester T, Strack D, Hause B (2001) Reorganization of tobacco root plastids during arbuscule development. *Planta* **213**: 864–868
- Fester T, Wray V, Nimtz M, Strack D (2005) Is stimulation of carotenoid biosynthesis in arbuscular mycorrhizal roots a general phenomenon? *Phytochemistry* **66**: 1781–1786
- Fiehn O, Kopka J, Dörmann P, Altmann T, Trethewey RN, Willmitzer L (2000a) Metabolite profiling for plant functional genomics. *Nat Biotechnol* **18**: 1157–1161
- Fiehn O, Kopka J, Trethewey RN, Willmitzer L (2000b) Identification of uncommon plant metabolites based on calculation of elemental compositions using gas chromatography and quadrupole mass spectrometry. *Anal Chem* **72**: 3573–3580
- Geigenberger P, Stitt M, Fernie AR (2004) Metabolic control analysis and regulation of the conversion of sucrose to starch in growing potato tubers. *Plant Cell Environ* **27**: 655–673
- Gianinazzi-Pearson V (1996) Plant cell responses to arbuscular mycorrhizal fungi: getting to the roots of the symbiosis. *Plant Cell* **8**: 1871–1883
- Hans J, Hause B, Strack D, Walter MH (2004) Cloning, characterization, and immunolocalization of a mycorrhiza-inducible 1-deoxy-*D*-xylulose 5-phosphate reductoisomerase in arbuscule-containing cells of maize. *Plant Physiol* **134**: 614–624
- Harrison MJ, Dewbre GR, Liu J (2002) A phosphate transporter from *Medicago truncatula* involved in the acquisition of phosphate released by arbuscular mycorrhizal fungi. *Plant Cell* **14**: 2413–2429
- Hause B, Fester T (2004) Molecular and cell biology of arbuscular mycorrhizal symbiosis. *Planta* **221**: 184–196

- Hodge A, Campbell CD, Fitter AH** (2001) An arbuscular mycorrhizal fungus accelerates decomposition and acquires nitrogen directly from organic material. *Nature* **413**: 297–299
- Imaizumi-Anraku H, Takeda N, Charpentier M, Perry J, Miwa H, Umehara Y, Kouchi H, Murakami Y, Mulder L, Vickers K, et al** (2005) Plastid proteins crucial for symbiotic fungal and bacterial entry into plant roots. *Nature* **433**: 527–531
- Isayenkov S, Fester T, Hause B** (2004) Rapid determination of fungal colonization and arbuscule formation in roots of *Medicago truncatula* using real-time (RT) PCR. *J Plant Physiol* **161**: 1379–1383
- Journet EP, van Tuinen D, Gouzy J, Crespeau H, Carreau V, Farmer MJ, Niebel A, Schiex T, Jaillon O, Chatagnier O, et al** (2002) Exploring root symbiotic programs in the model legume *Medicago truncatula* using EST analysis. *Nucleic Acids Res* **30**: 5579–5592
- Kwok EY, Hanson MR** (2004) Stromules and the dynamic nature of plastid morphology. *J Microsc (Oxf)* **214**: 124–137
- Liu J, Blaylock LA, Endre G, Cho J, Town CD, VandenBosch KA, Harrison MJ** (2003) Transcript profiling coupled with spatial expression analyses reveals genes involved in distinct developmental stages of an arbuscular mycorrhizal symbiosis. *Plant Cell* **15**: 2106–2123
- Logan DC, Leaver CJ** (2000) Mitochondria-targeted GFP highlights the heterogeneity of mitochondrial shape, size and movement within living plant cells. *J Exp Bot* **51**: 865–871
- Mackenzie S, McIntosh L** (1999) Higher plant mitochondria. *Plant Cell* **11**: 571–585
- Maier W, Peipp H, Schmidt J, Wray V, Strack D** (1995) Levels of a terpenoid glycoside (blumenin) and cell wall-bound phenolics in some cereal mycorrhizas. *Plant Physiol* **109**: 465–470
- Marques JP, Schattat MH, Hause G, Dudeck I, Klösgen RB** (2004) *In vivo* transport of folded EGFP by the  $\Delta$ pH/TAT-dependent pathway in chloroplasts of *Arabidopsis thaliana*. *J Exp Bot* **55**: 1697–1706
- Niwa Y, Hirano T, Yoshimoto K, Shimizu M, Kobayashi H** (1999) Non-invasive quantitative detection and applications of non-toxic, S65T-type green fluorescent protein in living plants. *Plant J* **18**: 455–463
- Olsson PA** (1999) Signature fatty acids provide tools for determination of the distribution and interactions of mycorrhizal fungi in soil. *FEMS Microbiol Ecol* **29**: 303–310
- Osteryoung KW, McAndrew RS** (2001) The plastid division machine. *Annu Rev Plant Physiol Plant Mol Biol* **52**: 315–333
- Philips JM, Hayman DS** (1970) Improved procedures for cleaning roots and staining parasitic and vesicular-arbuscular mycorrhizal fungi for rapid assessment of infection. *Trans Br Mycol Soc* **55**: 158–162
- Roessner U, Wagner C, Kopka J, Trethewey RN, Willmitzer L** (2000) Simultaneous analysis of metabolites in potato tuber by gas chromatography-mass spectrometry. *Plant J* **23**: 131–142
- Schwartz SH, Qin X, Zeevaert AD** (2001) Characterization of a novel carotenoid cleavage dioxygenase from plants. *J Biol Chem* **276**: 25208–25211
- Schwender J, Ohlrogge J, Shachar-Hill Y** (2004) Understanding flux in plant metabolic networks. *Curr Opin Plant Biol* **7**: 309–317
- Smith SE, Read DJ** (1997) *Mycorrhizal Symbiosis*, Ed 2. Academic Press, London
- Strack D, Fester T, Hause B, Schliemann W, Walter MH** (2003) Arbuscular mycorrhiza: biological, chemical and molecular aspects. *J Chem Ecol* **29**: 1955–1979
- Walter MH, Fester T, Strack D** (2000) Arbuscular mycorrhizal fungi induce the non-mevalonate methylerythritol phosphate pathway of isoprenoid biosynthesis correlated with accumulation of the “yellow pigment” and other apocarotenoids. *Plant J* **21**: 571–578
- Waters MT, Fray RG, Pyke KA** (2004) Stromule formation is dependent upon plastid size, plastid differentiation status and the density of plastids within the cell. *Plant J* **39**: 655–667
- Wright DP, Huppe HC, Turpin DH** (1997) *In vivo* and *in vitro* studies of glucose-6-phosphate dehydrogenase from barley root plastids in relation to reductant supply for  $\text{NO}_2^-$  assimilation. *Plant Physiol* **114**: 1413–1419
